# Supplementary material for: Nickel oxide aerogel for high performance supercapacitor electrodes
Source: Royal Society of Chemistry journal article supplement (doi:10.1039/c6ra24436j), 2016-01-01
Supplement: c6ra24436j1.pdf [file c6ra24436j1.pdf]

## Electronic Supplementary Information

### **Nickel Oxide Aerogel for High Performance Supercapacitor Electrode**

Zhiyi Zhang<sup>a</sup>, Qiuyue Gao<sup>a</sup>, Haibo Gao<sup>a</sup>, Zhenyu Shi<sup>a</sup>, Junwei Wu<sup>c</sup>, Mingjia Zhi<sup>a,\*</sup>,  
Zhanglian Hong<sup>a,b,\*</sup>

a State Key Laboratory of Silicon Materials, School of Materials Science and Engineering, Zhejiang University, Hangzhou 310027, PR China

b Research Center of Near Space Aircraft Technology, Zhejiang University, Hangzhou 310027, PR China

c Department of Materials Science and Engineering, Harbin Institute of Technology, Shenzhen Graduate School, Shenzhen 518055, PR China

\* Corresponding authors.

E-mail address: hong\_zhanglian@zju.edu.cn, mingjia\_zhi@zju.edu.cn

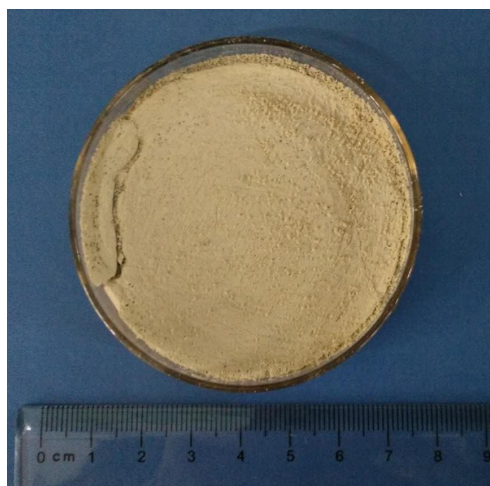

Figure S1 Digital photograph of the as-prepared monolithic NiO aerogel.

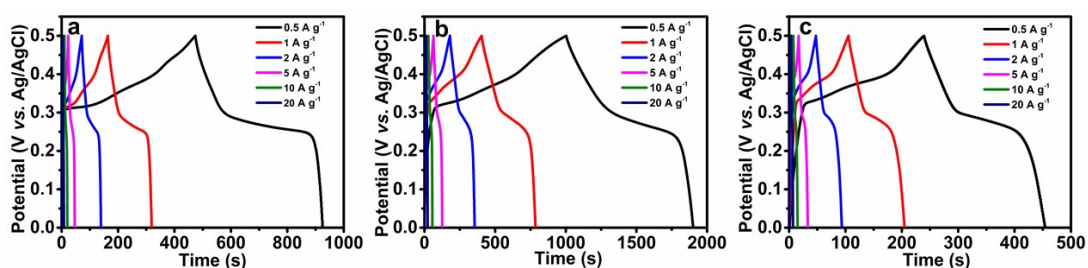

Figure S2 (a), (b) and (c) are the galvanostatic charge/discharge curves of electrodes made of A1, A2 and A3 in 6 M KOH at different current density from 0.5 to 20 A g<sup>-1</sup>, respectively.

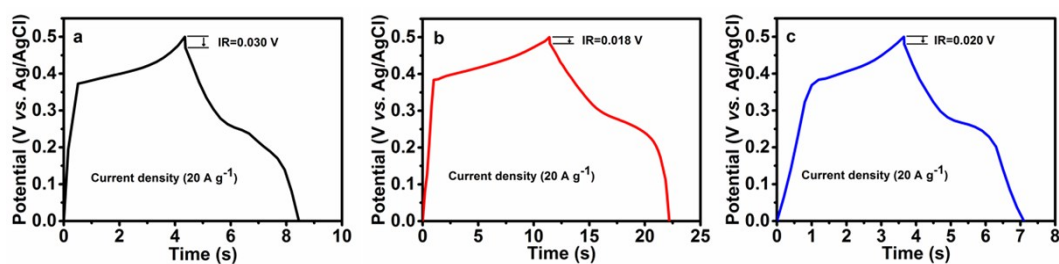

Figure S3 (a), (b) and (c) are the galvanostatic charge/discharge curves of electrodes made of A1, A2 and A3 in 6 M KOH at current density of 20 A g<sup>-1</sup>, respectively. The IR drop of each electrode was labeled.

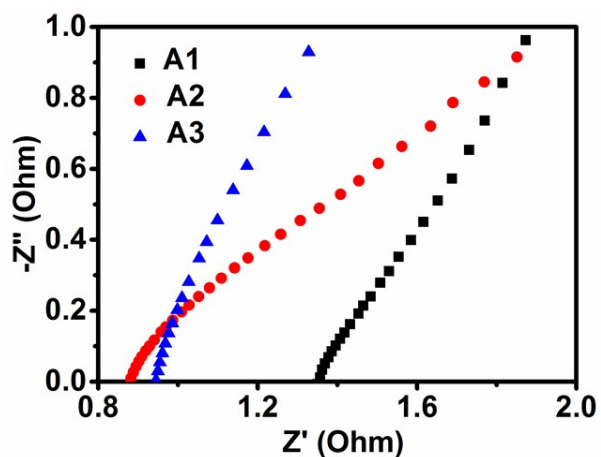

Figure S4 (a), (b) and (c) are EIS spectra of electrodes made of A1, A2 and A3 in 6 M KOH at high frequency range, the equivalent series resistances of electrodes made of A1, A2 and A3 are 1.36, 0.88 and 0.95  $\Omega$ , respectively.

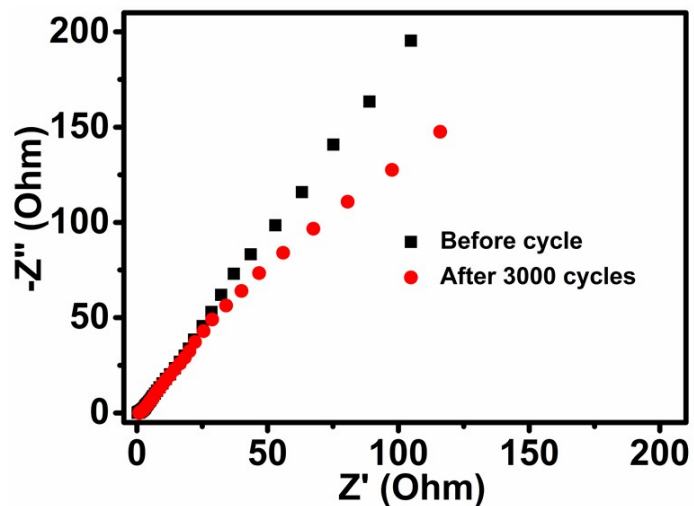

**Figure S5** EIS spectra of A2 before and after 3000 cycles of charge-discharge at the current density of 10 A g<sup>-1</sup>.
